# Supplementary material for: A comparative analysis of chromatin accessibility in cattle, pig, and mouse tissues
Source: PubMed Central journal article supplement (PMC7541309; doi:10.1186/s12864-020-07078-9), 2020-10-07
Supplement: 12864_2020_7078_MOESM1_ESM.pdf [file 12864_2020_7078_MOESM1_ESM.pdf]

A comparative analysis of chromatin accessibility in cattle, pig,  
and mouse tissues

Halstead et al.

Supplementary Figures and Tables

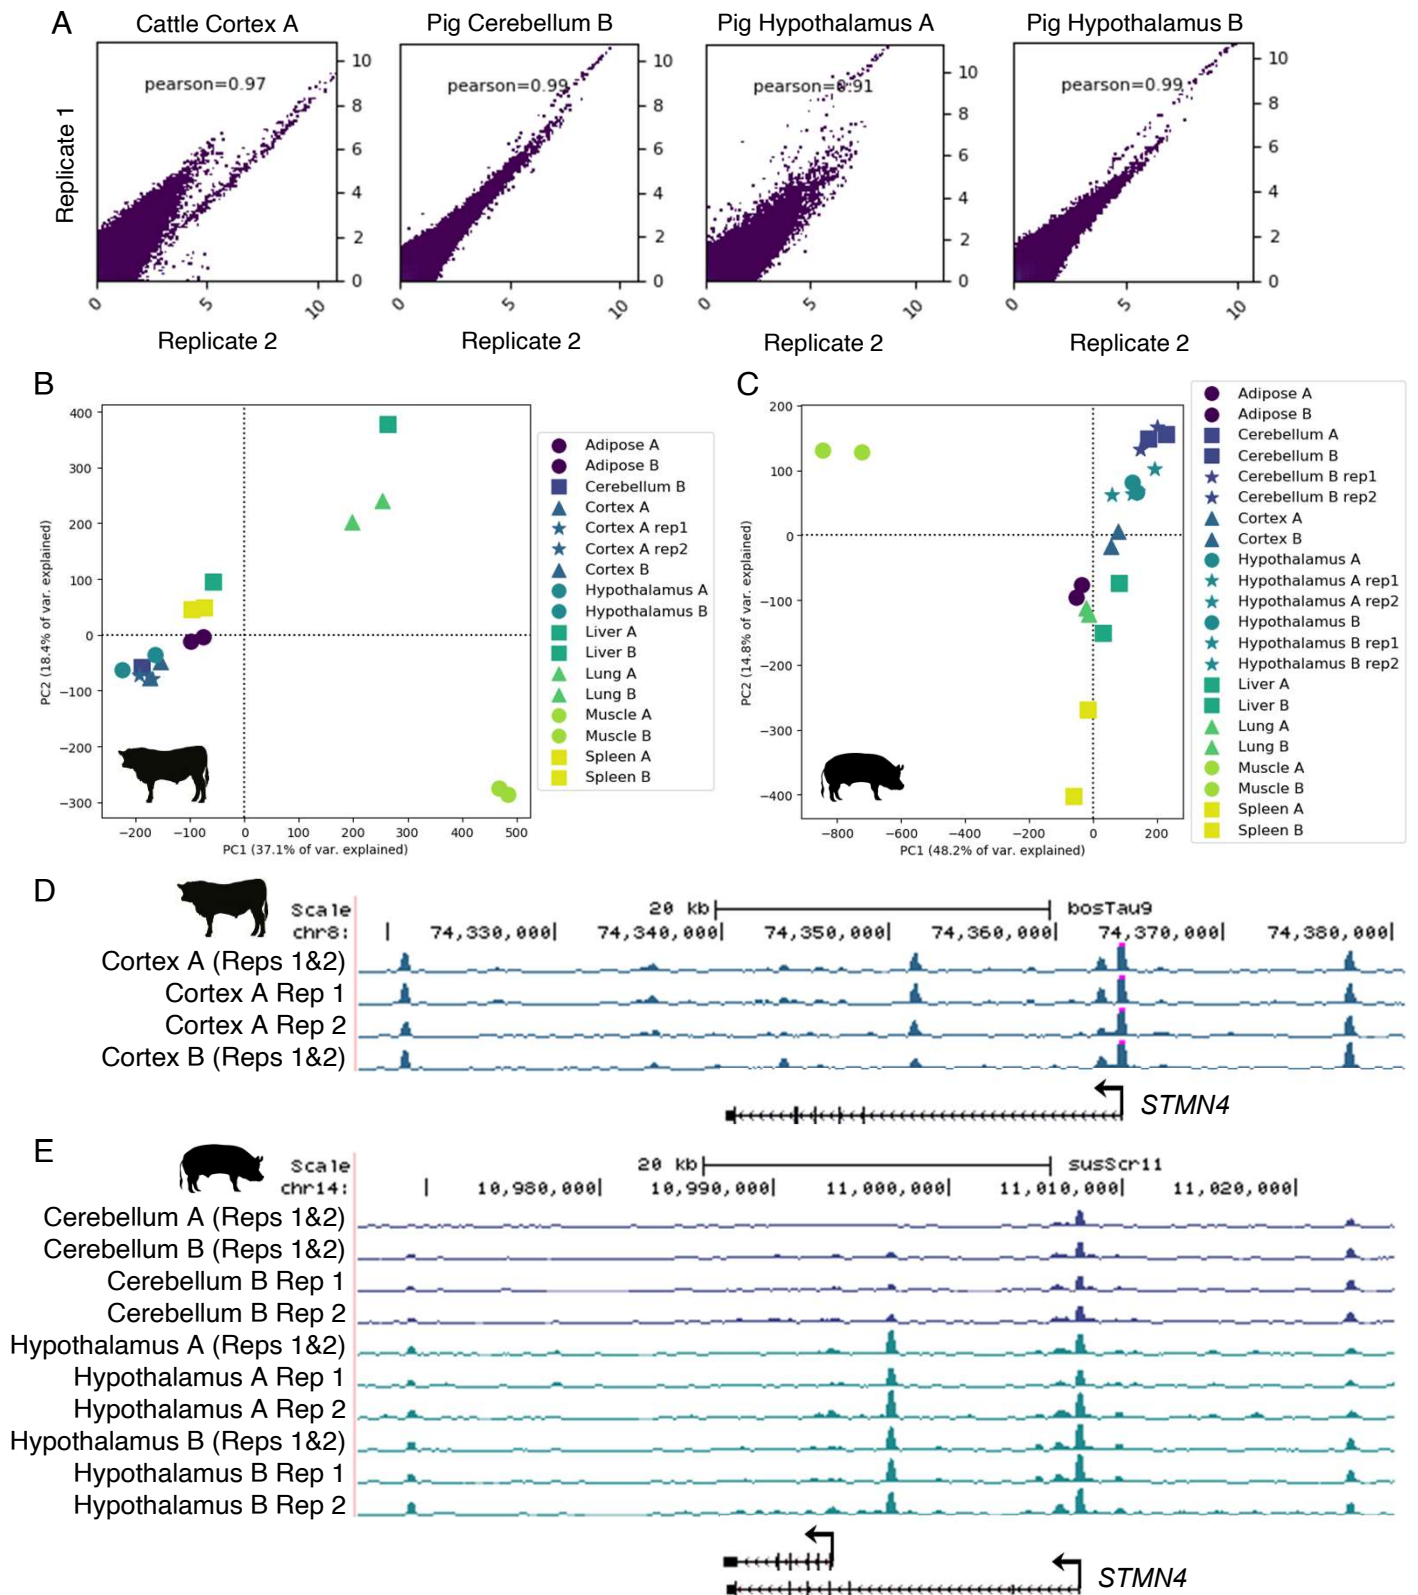

**Figure S1. Correlation of ATAC-seq signal in select technical replicates ATAC-seq libraries.** A) Pearson correlation of genome-wide signal (RPKM) in 500 bp windows. B) PCA of Cortex A technical replicate libraries alongside all biological replicates. C) PCA of pig technical replicate libraries alongside all biological replicates. D) Signal of cattle cortex technical and biological replicates at the *STMN4* locus. E) Signal of pig cerebellum and hypothalamus technical and biological replicates at the *STMN4* locus.

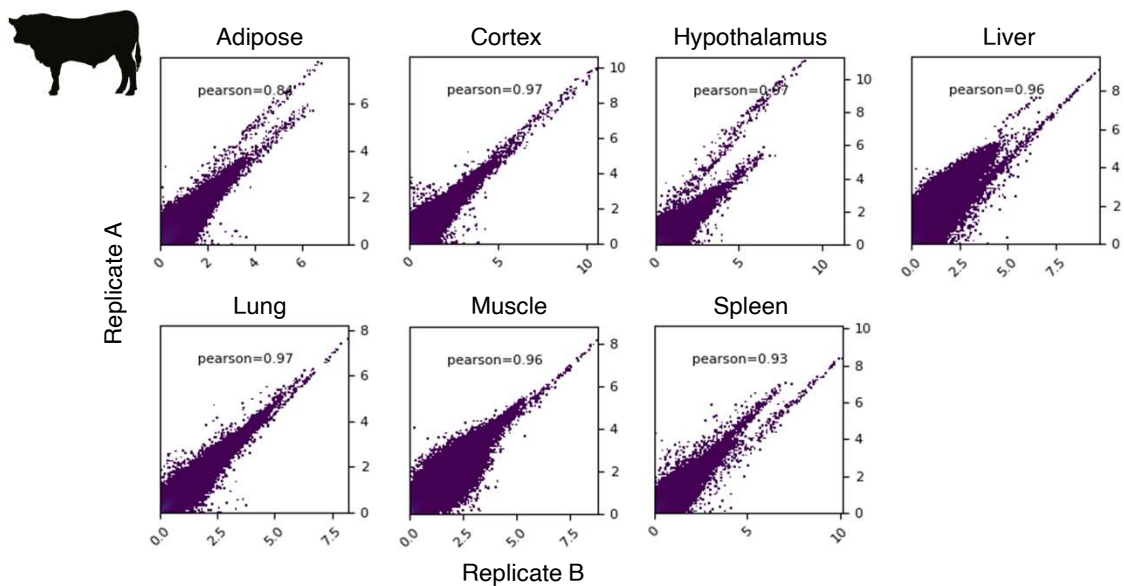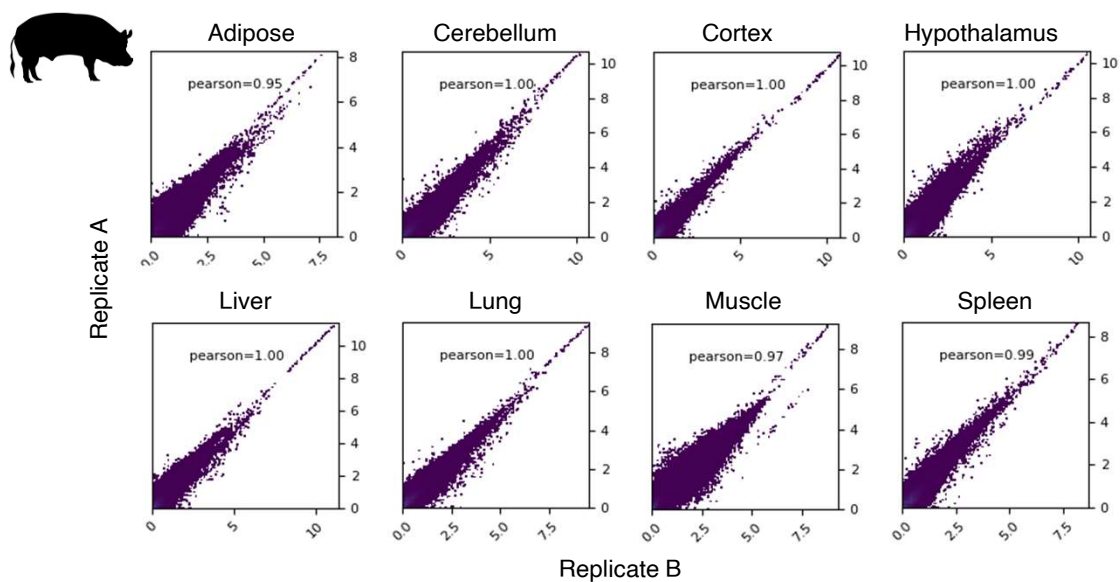

**Figure S2. Correlation of ATAC-seq signal in biological replicates.** Scatterplots showing Pearson correlation of normalized genome-wide signal in 500 bp windows between biological replicates for cattle and pig tissues.

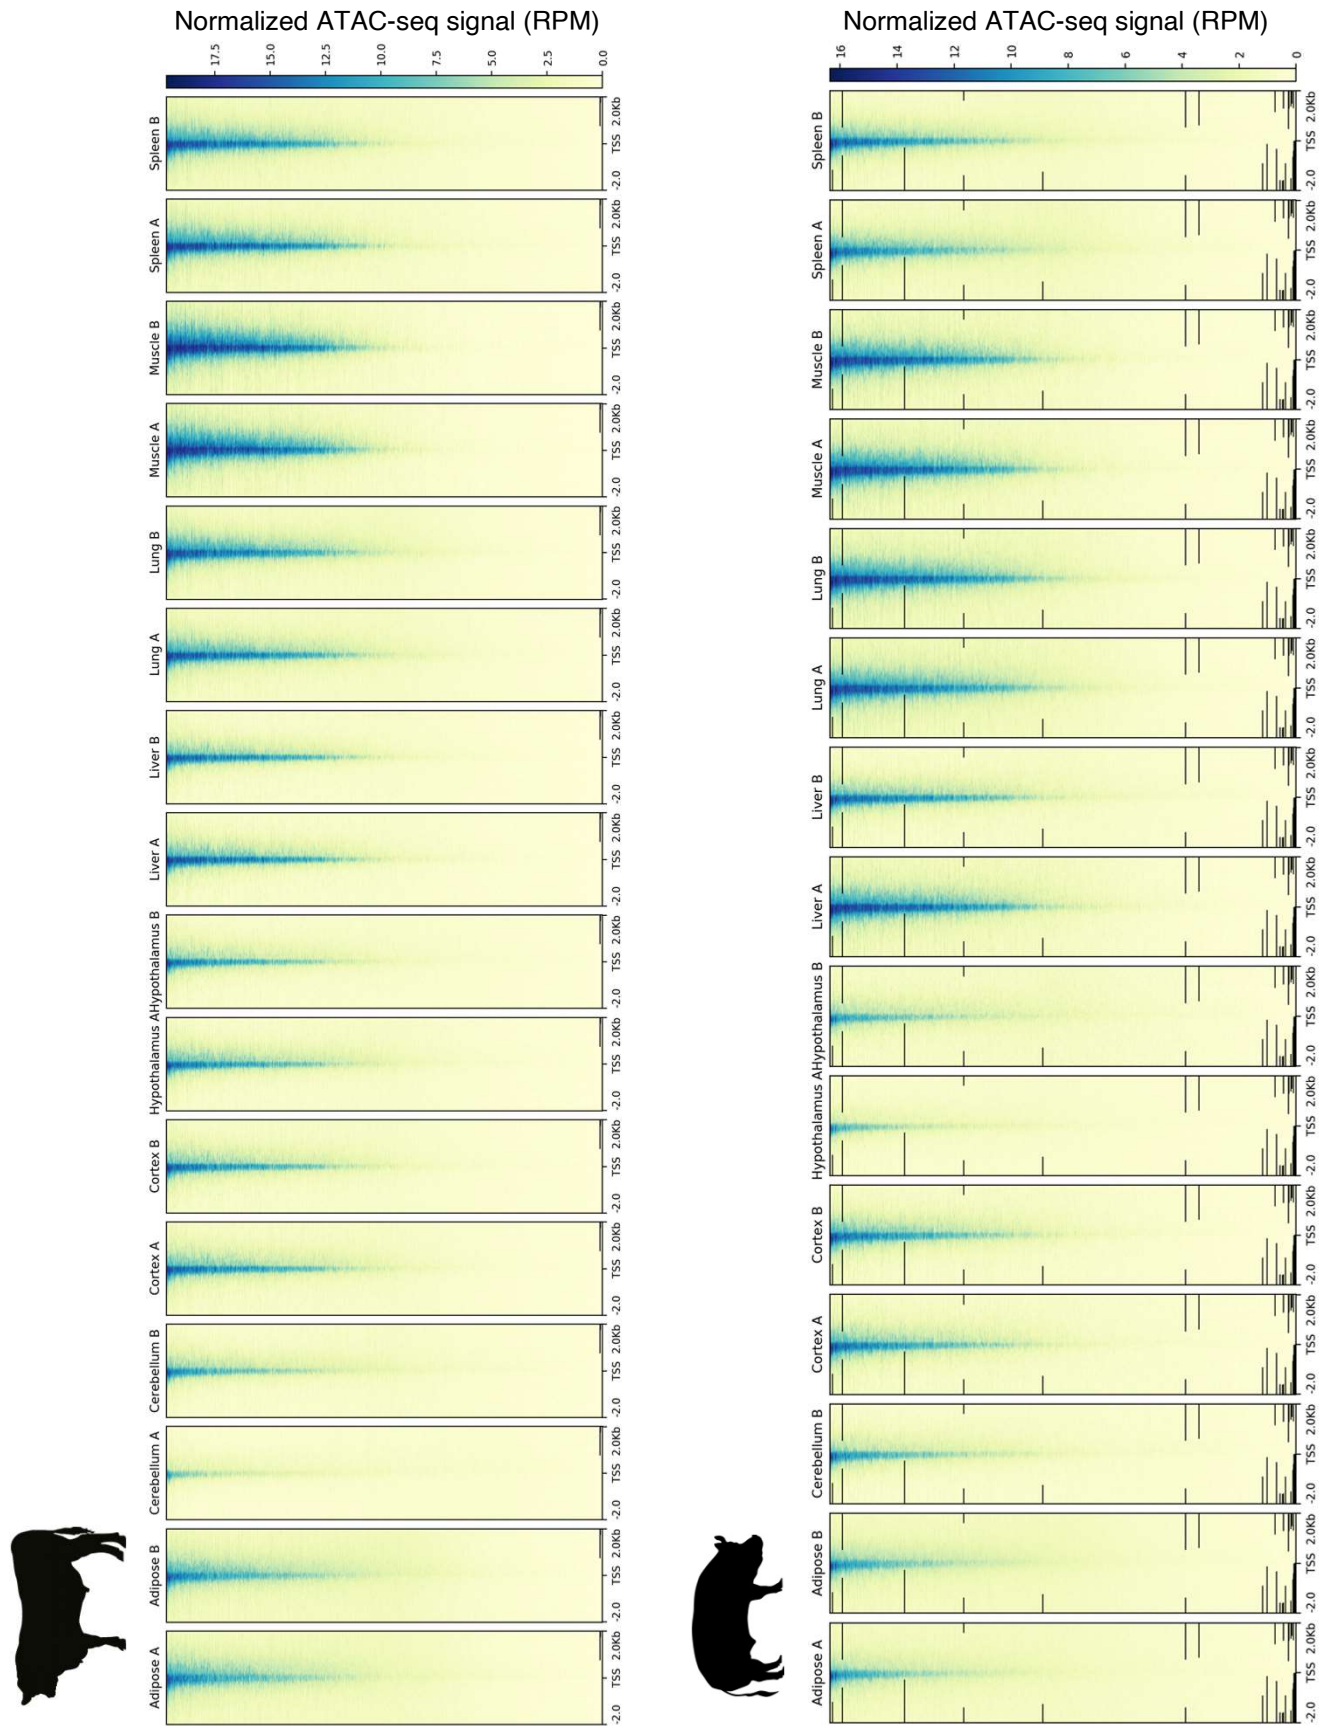

**Figure S3. ATAC-seq signal at TSS.** Heatmaps depicting normalized ATAC-seq signal in the proximity of TSS, including 2 kb upstream and downstream, with TSS sorted by signal intensity.

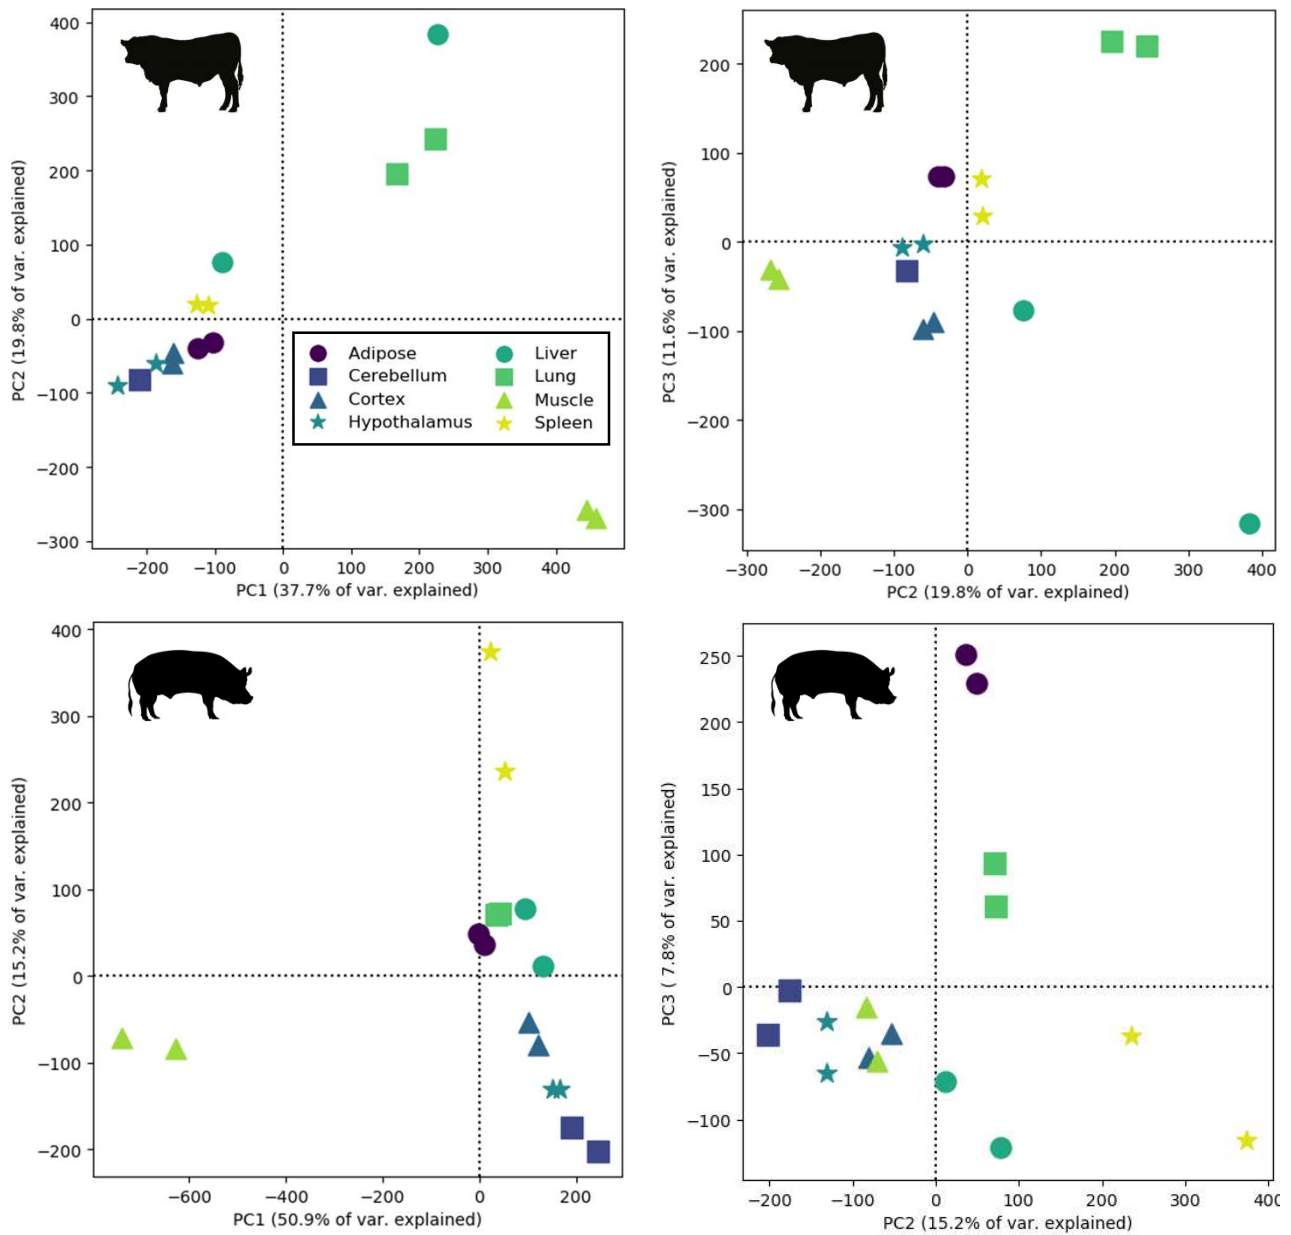

**Figure S4. PCA of normalized ATAC-seq signal in consensus open chromatin identified in pig and cattle tissues.** Principal components 1, 2 and 3 are included to better visualize clustering of tissues.

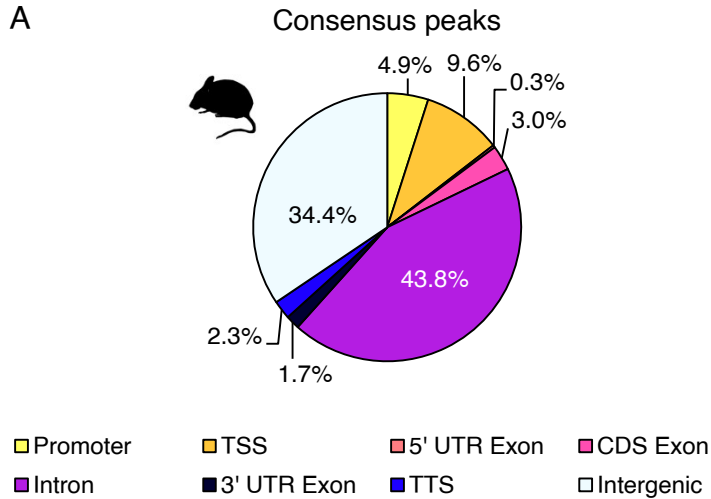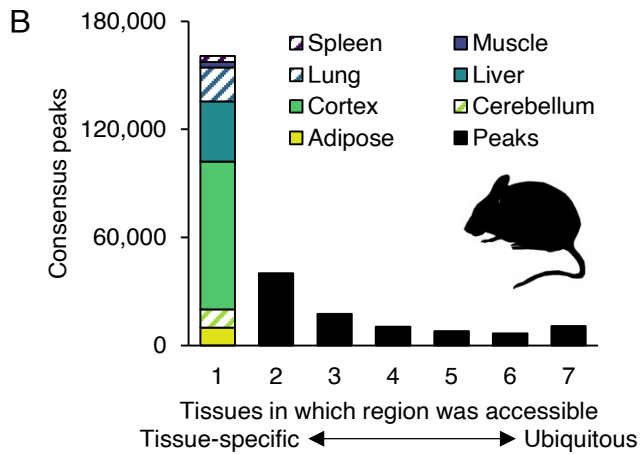

**Figure S5. Mouse open chromatin localization and differential accessibility.** A) Distribution of mouse consensus open chromatin relative to the Ensembl gene annotation (v96). B) Distribution of consensus peak activity, ranging from tissue-specific (accessible in only one tissue) to ubiquitous (accessible in all sampled tissues). Consensus peaks that were accessible in a single tissue were further broken down by tissue.

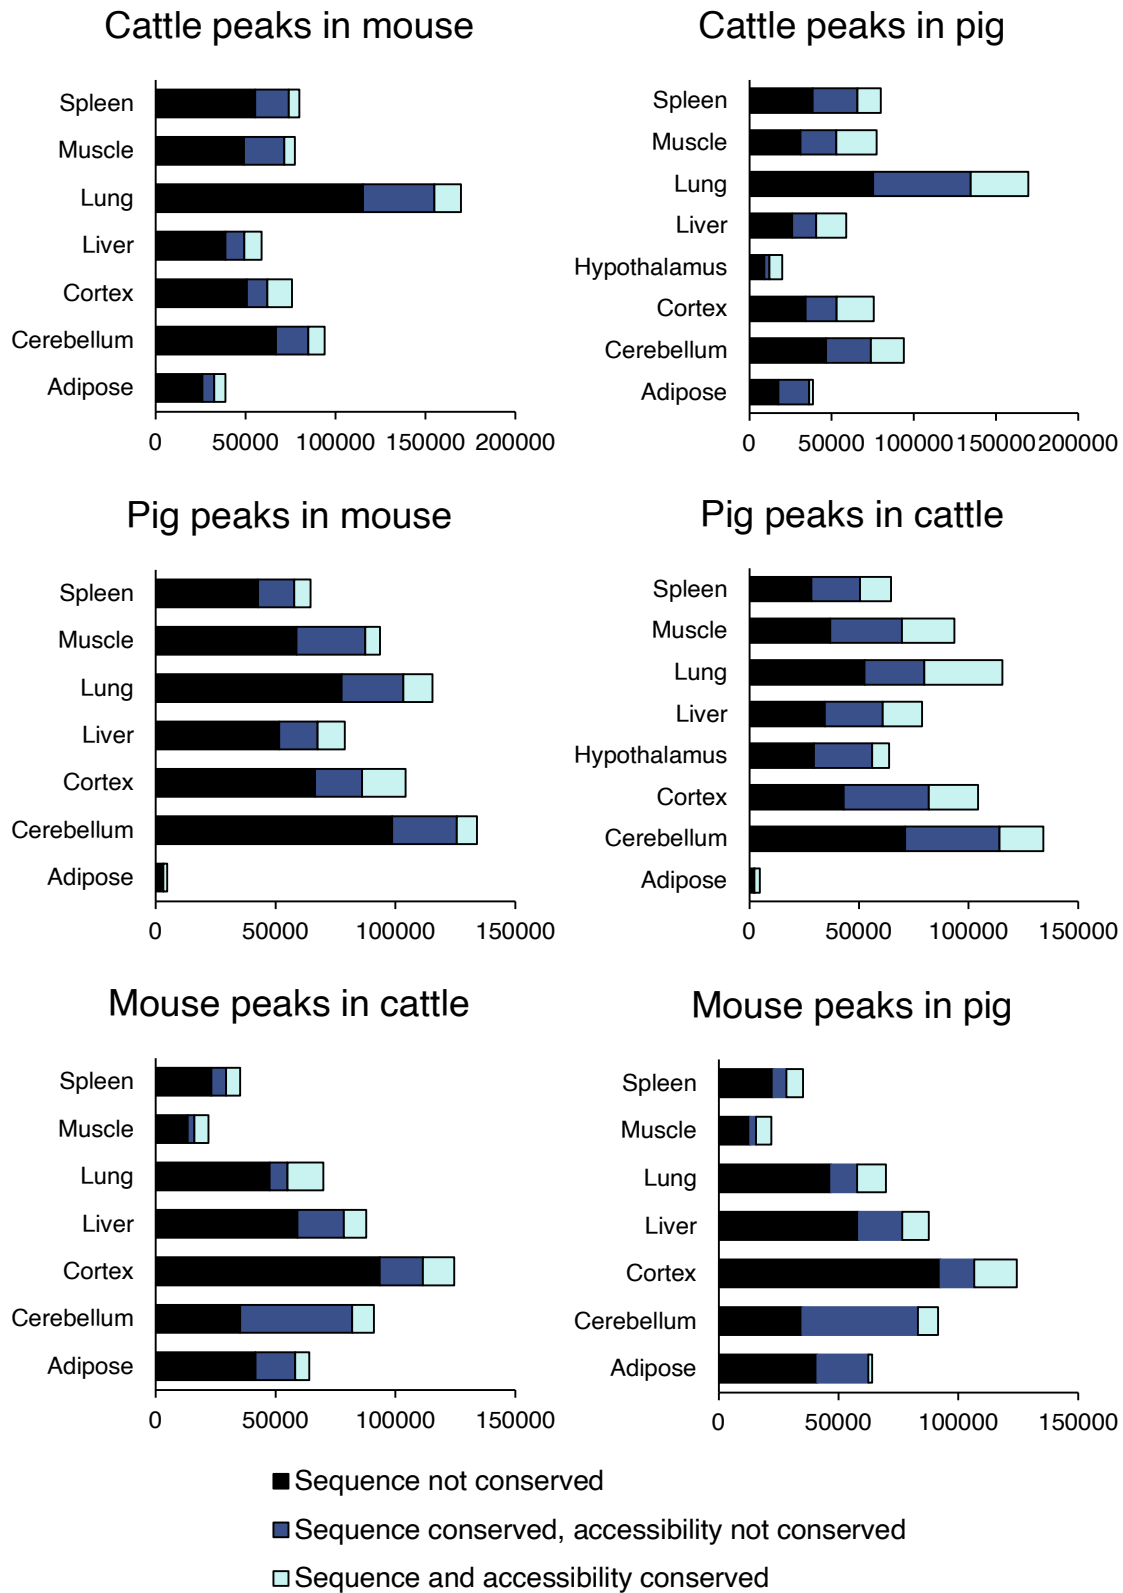

**Figure S6. Conservation of open chromatin in individual tissues.** Titles above bar plots indicate the species that consensus peaks were identified in, followed by the species to which the consensus peak coordinates were projected to evaluate accessibility conservation in the corresponding tissue.



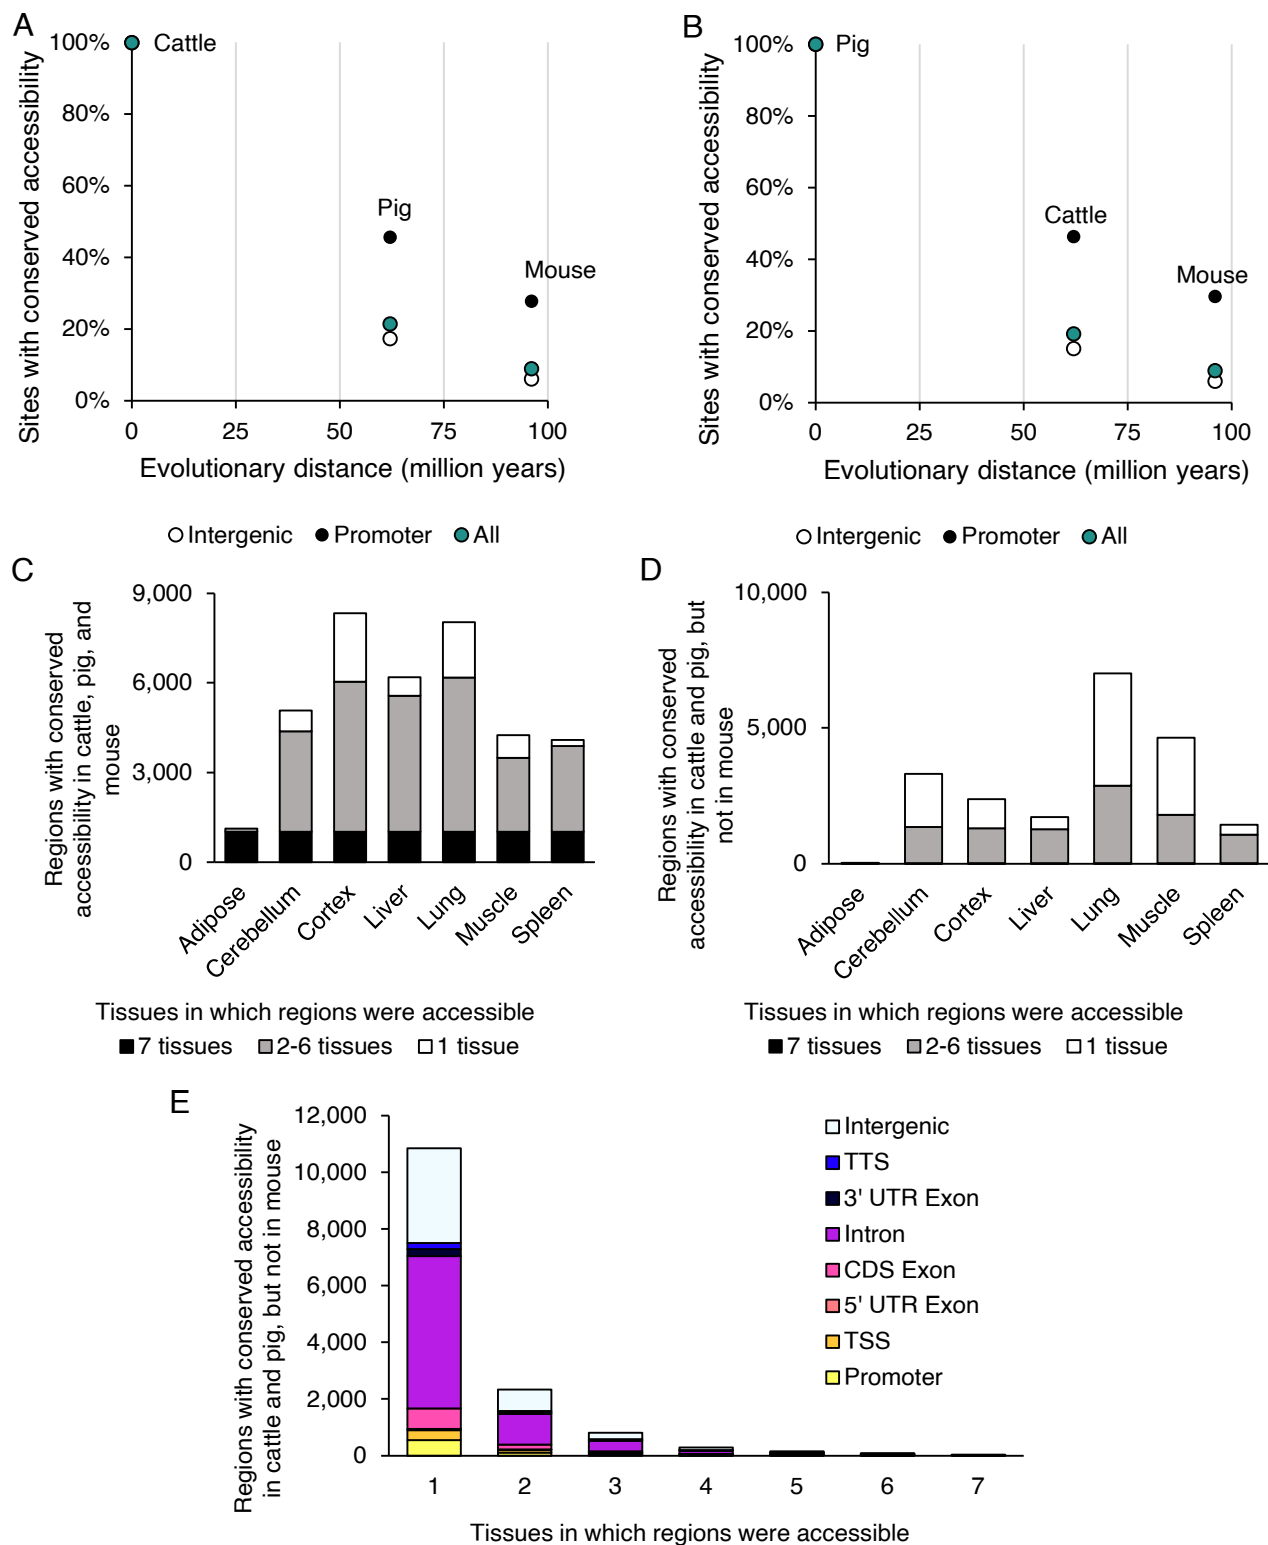

**Figure S7. Characterization of conserved open chromatin.** Proportion of all consensus peaks, promoter consensus peaks (within 2kb upstream and 50 bp downstream of TSS), and intergenic consensus peaks that were identified in (A) cattle or (B) pig that demonstrated both conserved sequence and accessibility in the other two species. Number of tissues in which consensus peaks demonstrated conserved accessibility in (C) all three species or (D) only in cattle and pig. E) Distribution of consensus peaks with conserved accessibility in cattle, pig, and mouse, relative to the mouse gene annotation (Ensembl v96).



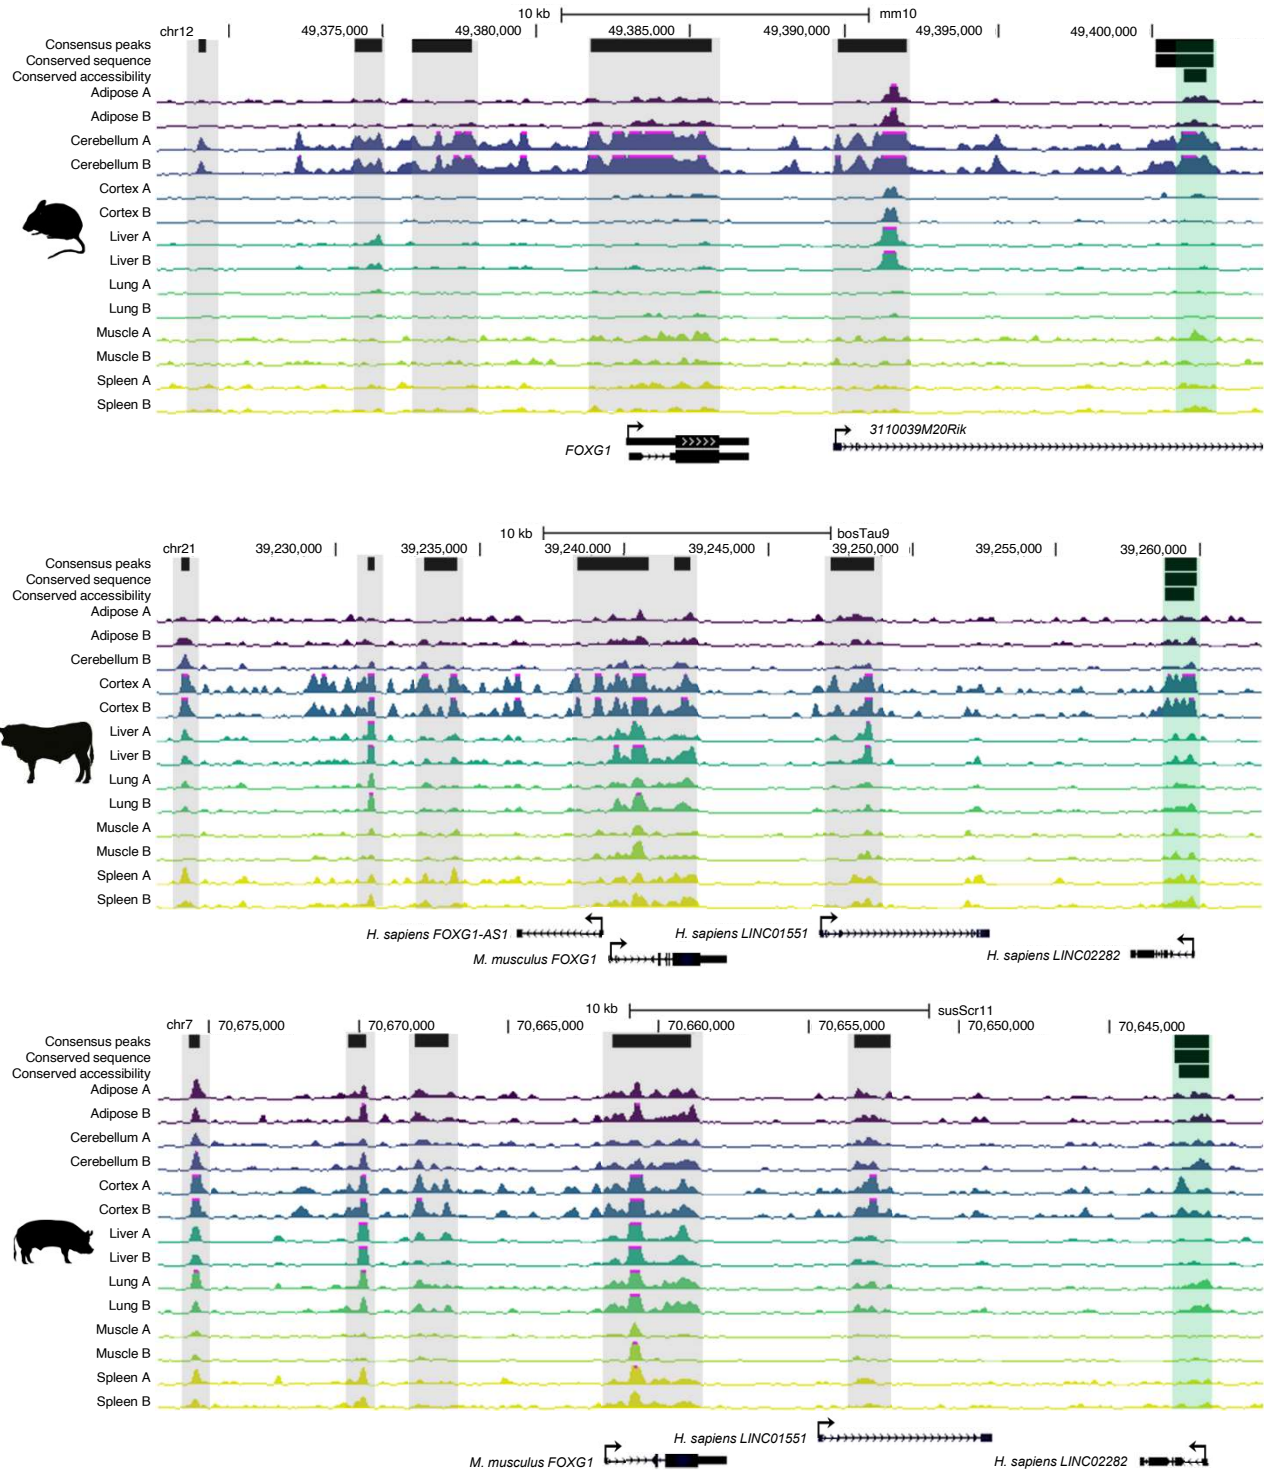

**Figure S8. Positional conservation of chromatin accessibility at the *FOXG1* locus.** For each species, consensus peaks, consensus peaks with conserved sequence (that could be mapped to all three species), and consensus peaks with conserved accessibility are shown. Tracks show normalized ATAC-seq signal for each sample. Conserved promoter open chromatin is highlighted in green. Consensus peaks that appear to be syntenically conserved, relative to *FOXG1*, but which could not be mapped between species, are highlighted in grey.

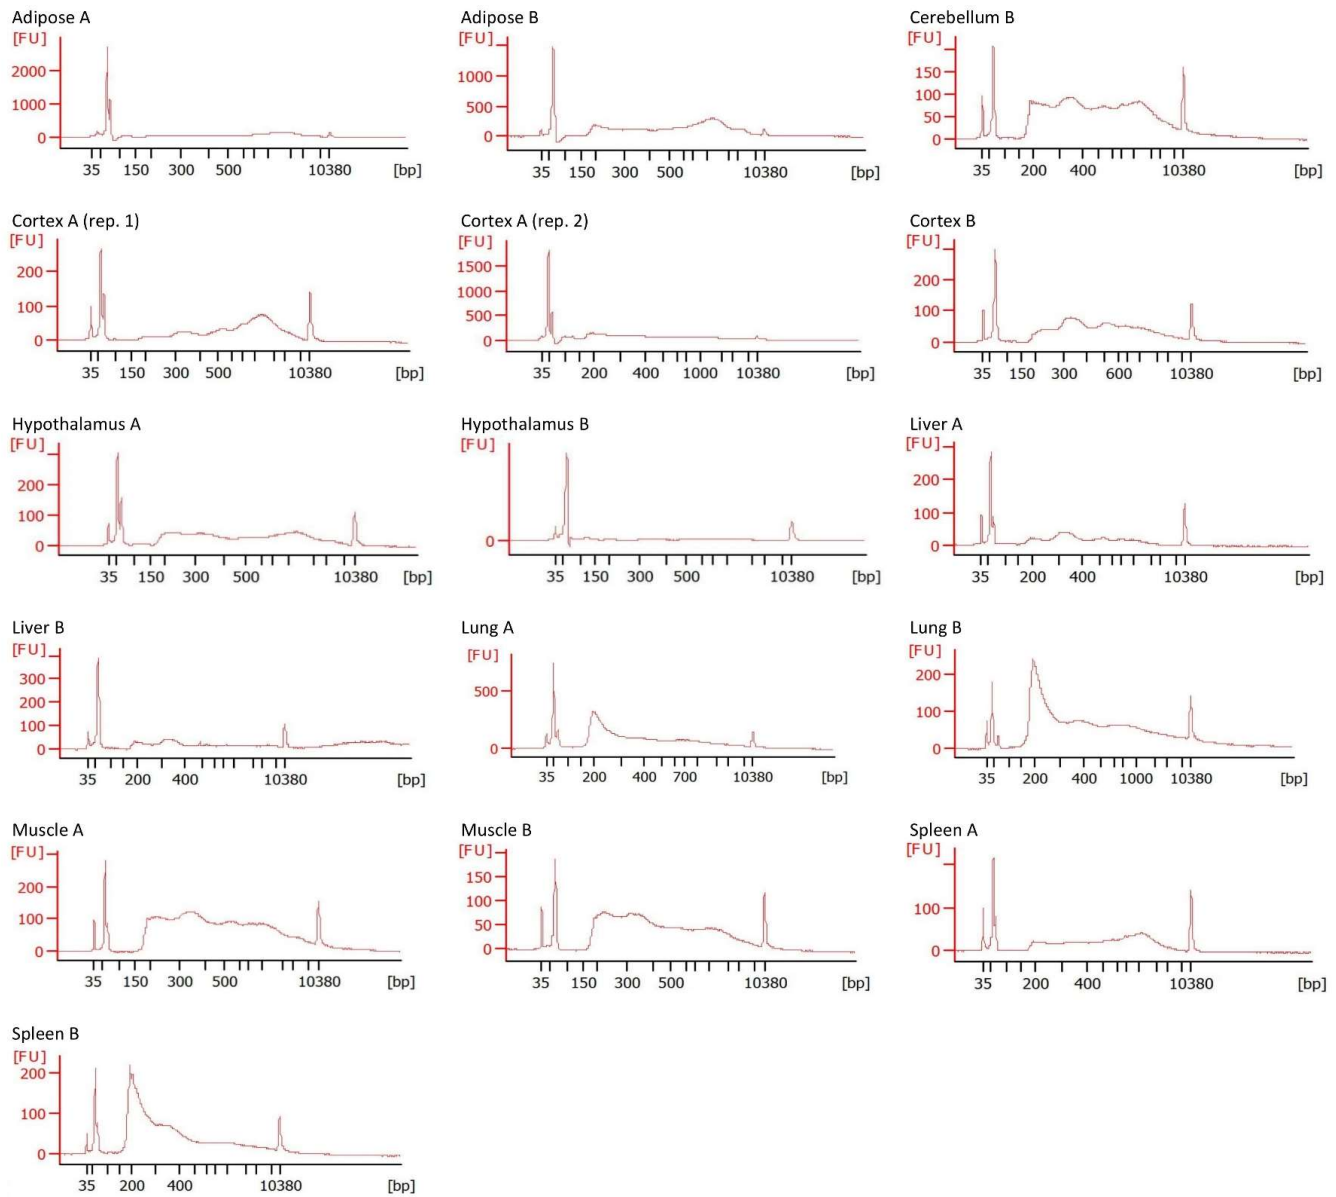

**Figure S9. Bioanalyzer traces of cattle ATAC-seq libraries prior to size selection.** Bioanalyzer traces were used to check for nucleosomal laddering. Size selection removed excess primer and fragments > 250 bp.

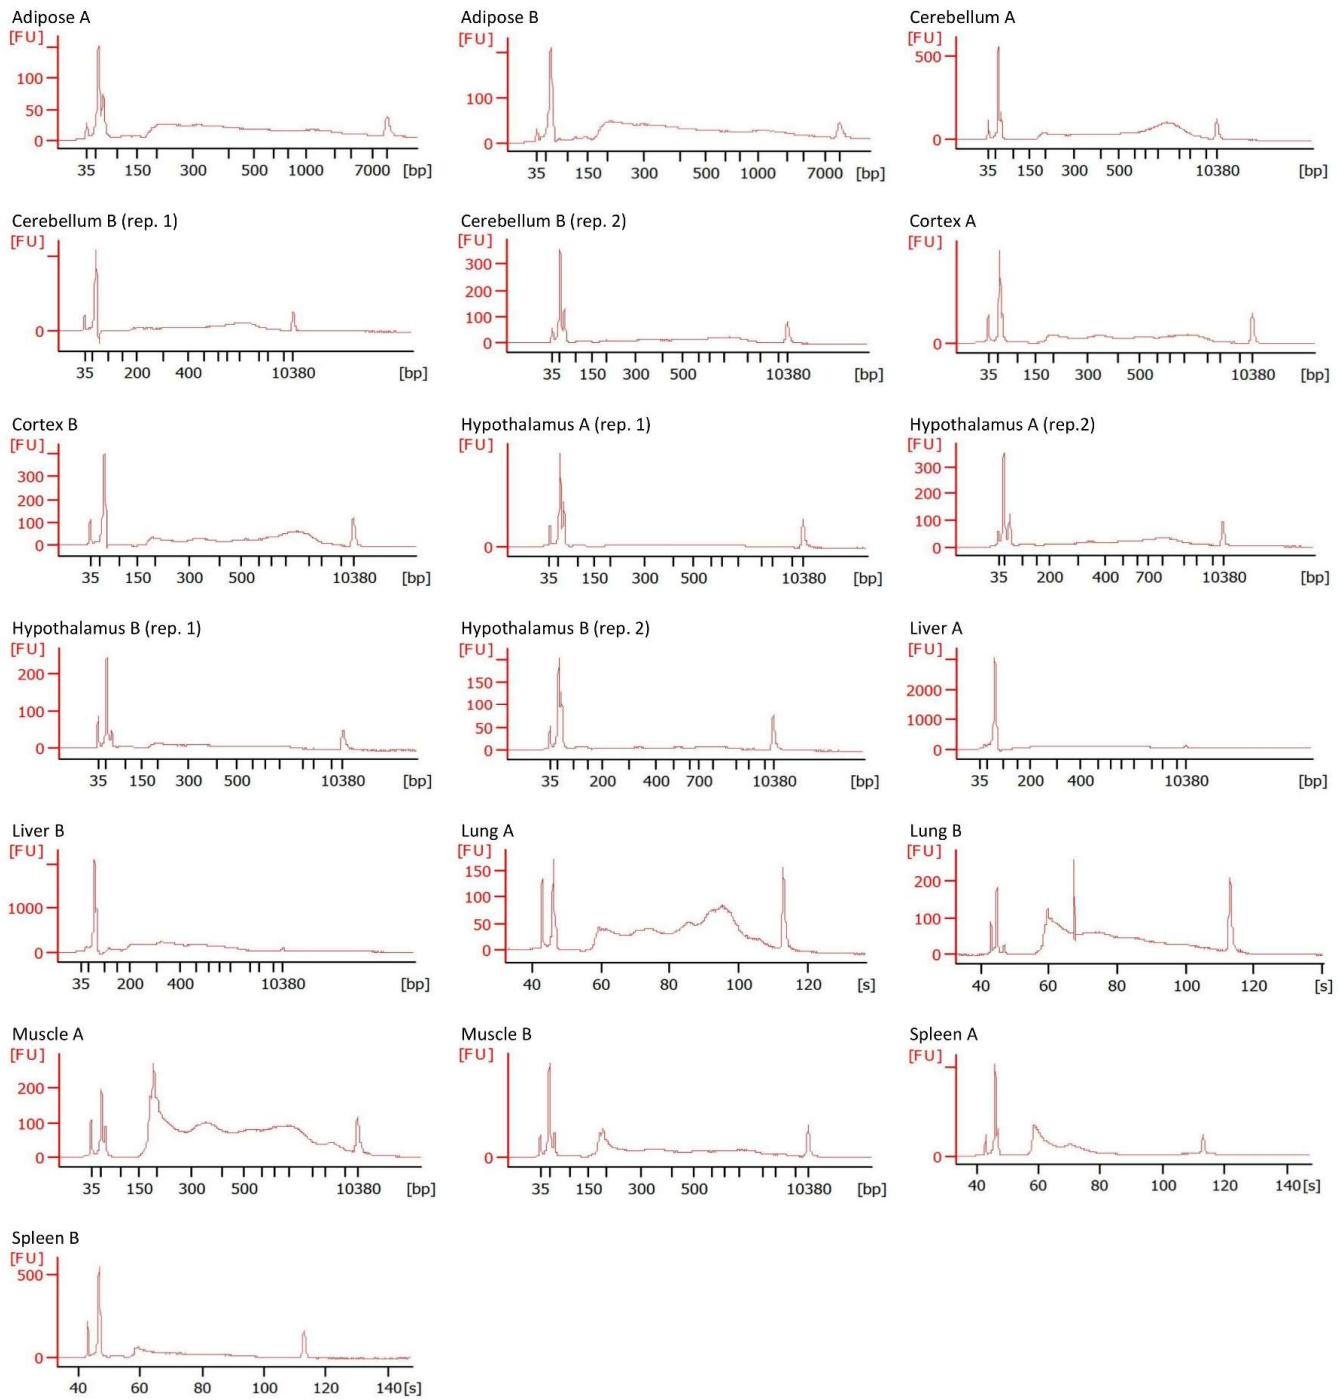

**Figure S10. Bioanalyzer traces of pig ATAC-seq libraries prior to size selection.** Bioanalyzer traces were used to check for nucleosomal laddering. Size selection removed excess primer and fragments > 250 bp.

**Table S1. ATAC-seq library construction details.** For each library constructed, rounds of PCR amplification, number of cells used as input, and concentration in the 150-250 bp range prior to size selection are indicated.

| Species | Tissue       | Biological replicate | Technical replicate | PCR cycles | Cell input | 150-250 bp range      |                |
|---------|--------------|----------------------|---------------------|------------|------------|-----------------------|----------------|
|         |              |                      |                     |            |            | Concentration (ng/ul) | Total DNA (ng) |
| Cattle  | Adipose      | A                    | 1                   | 10         | 50,000     | 0.51                  | 5.08           |
| Cattle  | Adipose      | B                    | 1                   | 10         | 200,000    | 1.57                  | 15.69          |
| Cattle  | Cerebellum   | B                    | 1                   | 12         | 500,000    | 3.27                  | 32.71          |
| Cattle  | Cerebellum   | B                    | 1                   | 12         | 500,000    | 3.27                  | 32.71          |
| Cattle  | Cortex       | A                    | 1                   | 12         | 200,000    | 0.55                  | 5.48           |
| Cattle  | Cortex       | A                    | 2                   | 13         | 1,000,000  | 2.00                  | 19.99          |
| Cattle  | Cortex       | B                    | 1                   | 12         | 200,000    | 1.57                  | 15.71          |
| Cattle  | Hypothalamus | A                    | 1                   | 11         | 500,000    | 1.95                  | 19.52          |
| Cattle  | Hypothalamus | B                    | 1                   | 11         | 500,000    | 0.22                  | 2.17           |
| Cattle  | Liver        | A                    | 1                   | 12         | 50,000     | 1.46                  | 14.62          |
| Cattle  | Liver        | B                    | 1                   | 12         | 500,000    | 1.77                  | 17.68          |
| Cattle  | Lung         | A                    | 1                   | 12         | 50,000     | 12.98                 | 129.78         |
| Cattle  | Lung         | B                    | 1                   | 12         | 50,000     | 7.37                  | 73.67          |
| Cattle  | Muscle       | A                    | 1                   | 12         | 100,000    | 4.15                  | 41.53          |
| Cattle  | Muscle       | B                    | 1                   | 12         | 70,000     | 4.08                  | 40.84          |
| Cattle  | Spleen       | A                    | 1                   | 12         | 50,000     | 1.17                  | 11.67          |
| Cattle  | Spleen       | B                    | 1                   | 12         | 50,000     | 9.59                  | 95.86          |
| Pig     | Adipose      | A                    | 1                   | 12         | 500,000    | 3.42                  | 34.22          |
| Pig     | Adipose      | B                    | 1                   | 12         | 500,000    | 4.52                  | 45.24          |
| Pig     | Cerebellum   | A                    | 1                   | 10         | 200,000    | 1.28                  | 12.85          |
| Pig     | Cerebellum   | B                    | 1                   | 10         | 500,000    | 0.91                  | 9.09           |
| Pig     | Cerebellum   | B                    | 2                   | 11         | 200,000    | 0.77                  | 7.66           |
| Pig     | Cortex       | A                    | 1                   | 10         | 200,000    | 1.48                  | 14.75          |
| Pig     | Cortex       | B                    | 1                   | 10         | 200,000    | 1.53                  | 15.34          |
| Pig     | Hypothalamus | A                    | 1                   | 12         | 500,000    | 0.47                  | 4.68           |
| Pig     | Hypothalamus | A                    | 2                   | 11         | 500,000    | 0.90                  | 8.98           |
| Pig     | Hypothalamus | B                    | 1                   | 12         | 500,000    | 1.41                  | 14.10          |
| Pig     | Hypothalamus | B                    | 2                   | 11         | 500,000    | 0.37                  | 3.65           |
| Pig     | Liver        | A                    | 1                   | 10         | 200,000    | 0.71                  | 7.06           |
| Pig     | Liver        | B                    | 1                   | 10         | 500,000    | 2.11                  | 21.08          |
| Pig     | Lung         | A                    | 1                   | 10         | 200,000    | 2.00                  | 20.00          |
| Pig     | Lung         | B                    | 1                   | 10         | 500,000    | 3.04                  | 30.36          |
| Pig     | Muscle       | A                    | 1                   | 10         | 500,000    | 6.26                  | 62.62          |
| Pig     | Muscle       | B                    | 1                   | 10         | 500,000    | 3.16                  | 31.65          |
| Pig     | Spleen       | A                    | 1                   | 10         | 500,000    | 7.04                  | 70.41          |
| Pig     | Spleen       | B                    | 1                   | 10         | 200,000    | 2.34                  | 23.40          |

**Table S2. Functional annotation clustering of genes with conserved and global TSS accessibility.** Genes with accessible TSS ( $\pm 50$  bp) in all profiled tissues in all species were subjected to functional annotation clustering to identify enriched cellular functions. Top four clusters reported.

| <i>Annotation Cluster 1</i> |                                            | <i>Enrichment Score: 6.83</i> | <i>Genes</i> | <i>p-value</i> | <i>Benjamini</i> |
|-----------------------------|--------------------------------------------|-------------------------------|--------------|----------------|------------------|
| GOTERM_BP_5                 | DNA repair                                 |                               | 54           | 6.50E-09       | 5.50E-06         |
| GOTERM_BP_5                 | DNA metabolic process                      |                               | 85           | 1.60E-07       | 5.90E-05         |
| GOTERM_BP_5                 | DNA recombination                          |                               | 31           | 3.20E-06       | 7.90E-04         |
| <i>Annotation Cluster 2</i> |                                            | <i>Enrichment Score: 5.44</i> | <i>Genes</i> | <i>p-value</i> | <i>Benjamini</i> |
| GOTERM_BP_5                 | cellular protein metabolic process         |                               | 322          | 4.80E-09       | 5.50E-06         |
| GOTERM_BP_5                 | cellular protein modification process      |                               | 245          | 5.00E-07       | 1.40E-04         |
| GOTERM_BP_5                 | protein modification process               |                               | 245          | 5.00E-07       | 1.40E-04         |
| GOTERM_BP_5                 | regulation of protein modification process |                               | 96           | 1.40E-01       | 8.50E-01         |
| <i>Annotation Cluster 3</i> |                                            | <i>Enrichment Score: 4.18</i> | <i>Genes</i> | <i>p-value</i> | <i>Benjamini</i> |
| GOTERM_CC_DIRECT            | chromosome                                 |                               | 42           | 4.10E-07       | 3.20E-05         |
| GOTERM_CC_DIRECT            | chromosome, centromeric region             |                               | 21           | 3.30E-05       | 1.50E-03         |
| GOTERM_CC_DIRECT            | kinetochore                                |                               | 17           | 4.00E-04       | 1.50E-02         |
| GOTERM_CC_DIRECT            | condensed chromosome kinetochore           |                               | 12           | 3.60E-03       | 8.60E-02         |
| <i>Annotation Cluster 4</i> |                                            | <i>Enrichment Score: 3.82</i> | <i>Genes</i> | <i>p-value</i> | <i>Benjamini</i> |
| GOTERM_BP_5                 | mitotic sister chromatid segregation       |                               | 22           | 8.30E-06       | 1.50E-03         |
| GOTERM_BP_5                 | sister chromatid segregation               |                               | 24           | 1.60E-05       | 2.60E-03         |
| GOTERM_BP_5                 | mitotic metaphase plate congression        |                               | 9            | 3.20E-04       | 2.90E-02         |
| GOTERM_BP_5                 | establishment of chromosome localization   |                               | 12           | 7.30E-04       | 5.40E-02         |
| GOTERM_BP_5                 | metaphase plate congression                |                               | 9            | 2.60E-03       | 1.30E-01         |

**Table S3. Functional annotation clustering of genes near conserved intergenic open chromatin.** Genes that were closest (within 100kb) to intergenic open chromatin that was conserved in all three species were subjected to functional annotation clustering to identify enriched cellular functions. Top four clusters reported.

| <i>Annotation Cluster 1</i> |                                                    | <i>Enrichment Score: 5.93</i> | <i>Genes</i> | <i>p-value</i> | <i>Benjamini</i> |
|-----------------------------|----------------------------------------------------|-------------------------------|--------------|----------------|------------------|
| GOTERM_BP_5                 | nervous system development                         |                               | 41           | 1.30E-07       | 2.60E-04         |
| GOTERM_BP_5                 | central nervous system development                 |                               | 24           | 9.50E-07       | 9.30E-04         |
| GOTERM_BP_5                 | brain development                                  |                               | 19           | 1.30E-05       | 4.30E-03         |
| <i>Annotation Cluster 2</i> |                                                    | <i>Enrichment Score: 3.48</i> | <i>Genes</i> | <i>p-value</i> | <i>Benjamini</i> |
| GOTERM_BP_5                 | mesenchymal cell development                       |                               | 9            | 5.20E-05       | 1.10E-02         |
| GOTERM_BP_5                 | mesenchymal cell differentiation                   |                               | 9            | 8.70E-05       | 1.20E-02         |
| GOTERM_BP_5                 | mesenchyme development                             |                               | 10           | 1.10E-04       | 1.40E-02         |
| GOTERM_BP_5                 | ameboidal-type cell migration                      |                               | 11           | 3.00E-04       | 2.50E-02         |
| GOTERM_BP_5                 | neural crest cell migration                        |                               | 5            | 9.10E-04       | 4.80E-02         |
| GOTERM_BP_5                 | central nervous system neuron differentiation      |                               | 8            | 1.10E-03       | 5.40E-02         |
| GOTERM_BP_5                 | neural crest cell development                      |                               | 5            | 2.90E-03       | 1.10E-01         |
| <i>Annotation Cluster 3</i> |                                                    | <i>Enrichment Score: 3.26</i> | <i>Genes</i> | <i>p-value</i> | <i>Benjamini</i> |
| GOTERM_BP_5                 | regionalization                                    |                               | 12           | 7.70E-05       | 1.10E-02         |
| GOTERM_BP_5                 | embryo development ending in birth or egg hatching |                               | 17           | 1.50E-04       | 1.50E-02         |
| GOTERM_BP_5                 | neural tube development                            |                               | 6            | 1.50E-02       | 2.60E-01         |
| <i>Annotation Cluster 4</i> |                                                    | <i>Enrichment Score: 2.78</i> | <i>Genes</i> | <i>p-value</i> | <i>Benjamini</i> |
| GOTERM_BP_5                 | organ morphogenesis                                |                               | 24           | 3.10E-06       | 1.50E-03         |
| GOTERM_BP_5                 | cell migration                                     |                               | 22           | 2.60E-04       | 2.30E-02         |
| GOTERM_BP_5                 | ameboidal-type cell migration                      |                               | 11           | 3.00E-04       | 2.50E-02         |
| GOTERM_BP_5                 | cell development                                   |                               | 33           | 3.30E-04       | 2.50E-02         |
| GOTERM_BP_5                 | circulatory system development                     |                               | 20           | 4.10E-04       | 2.70E-02         |
| GOTERM_BP_5                 | cardiovascular system development                  |                               | 20           | 4.10E-04       | 2.70E-02         |
| GOTERM_BP_5                 | heart development                                  |                               | 14           | 6.70E-04       | 3.80E-02         |
| GOTERM_BP_5                 | vasculature development                            |                               | 13           | 5.40E-03       | 1.60E-01         |
| GOTERM_BP_5                 | blood vessel development                           |                               | 12           | 9.50E-03       | 2.10E-01         |
| GOTERM_BP_5                 | positive regulation of cell migration              |                               | 9            | 2.00E-02       | 3.10E-01         |
| GOTERM_BP_5                 | positive regulation of cell motility               |                               | 9            | 2.40E-02       | 3.20E-01         |
| GOTERM_BP_5                 | positive regulation of cellular component movement |                               | 9            | 2.70E-02       | 3.40E-01         |
| GOTERM_BP_5                 | angiogenesis                                       |                               | 7            | 1.20E-01       | 6.50E-01         |

**Table S4. ATAC-seq oligos used for PCR.** Sequences have been previously described by Buenrostro *et al*, 2013. Primers 2A-2X contain variable barcodes which permit library pooling prior to sequencing, and which were used to demultiplex sequencing data.

| <i>Primer</i> | <i>Sequence (5' to 3')</i>                             |
|---------------|--------------------------------------------------------|
| 1             | AATGATACGGCGACCACCGAGATCTACACTCGTCGGCAGCGTCAGATGTG     |
| 2A            | CAAGCAGAAGACGGCATAACGAGATCTAGTACGGTCTCGTGGGCTCGGAGATGT |
| 2B            | CAAGCAGAAGACGGCATAACGAGATTTCTGCCTGTCTCGTGGGCTCGGAGATGT |
| 2C            | CAAGCAGAAGACGGCATAACGAGATGCTCAGGAGTCTCGTGGGCTCGGAGATGT |
| 2D            | CAAGCAGAAGACGGCATAACGAGATAGGAGTCCGTCTCGTGGGCTCGGAGATGT |
| 2E            | CAAGCAGAAGACGGCATAACGAGATCATGCCTAGTCTCGTGGGCTCGGAGATGT |
| 2F            | CAAGCAGAAGACGGCATAACGAGATGTAGAGAGGTCTCGTGGGCTCGGAGATGT |
| 2G            | CAAGCAGAAGACGGCATAACGAGATCCTCTCTGGTCTCGTGGGCTCGGAGATGT |
| 2H            | CAAGCAGAAGACGGCATAACGAGATAGCGTAGCGTCTCGTGGGCTCGGAGATGT |
| 2I            | CAAGCAGAAGACGGCATAACGAGATCAGCCTCGGTCTCGTGGGCTCGGAGATGT |
| 2J            | CAAGCAGAAGACGGCATAACGAGATTGCCTCTTGTCTCGTGGGCTCGGAGATGT |
| 2K            | CAAGCAGAAGACGGCATAACGAGATTCTCTACGTCTCGTGGGCTCGGAGATGT  |
| 2L            | CAAGCAGAAGACGGCATAACGAGATATCACGACGTCTCGTGGGCTCGGAGATGT |
| 2M            | CAAGCAGAAGACGGCATAACGAGATACAGTGGTGTCTCGTGGGCTCGGAGATGT |
| 2N            | CAAGCAGAAGACGGCATAACGAGATCAGATCCAGTCTCGTGGGCTCGGAGATGT |
| 2O            | CAAGCAGAAGACGGCATAACGAGATACAAACGGGTCTCGTGGGCTCGGAGATGT |
| 2P            | CAAGCAGAAGACGGCATAACGAGATACCCAGCAGTCTCGTGGGCTCGGAGATGT |
| 2Q            | CAAGCAGAAGACGGCATAACGAGATAACCCCTCGTCTCGTGGGCTCGGAGATGT |
| 2R            | CAAGCAGAAGACGGCATAACGAGATCCCAACCTGTCTCGTGGGCTCGGAGATGT |
| 2S            | CAAGCAGAAGACGGCATAACGAGATCACACACGTCTCGTGGGCTCGGAGATGT  |
| 2T            | CAAGCAGAAGACGGCATAACGAGATGAAACCCAGTCTCGTGGGCTCGGAGATGT |
| 2U            | CAAGCAGAAGACGGCATAACGAGATTGTGACCAGTCTCGTGGGCTCGGAGATGT |
| 2V            | CAAGCAGAAGACGGCATAACGAGATAGGGTCAAGTCTCGTGGGCTCGGAGATGT |
| 2W            | CAAGCAGAAGACGGCATAACGAGATAGGAGTGGGTCTCGTGGGCTCGGAGATGT |
| 2X            | CAAGCAGAAGACGGCATAACGAGATTGCCTTAGTCTCGTGGGCTCGGAGATGT  |
